# Supplementary material for: NPF:network propagation for protein function prediction
Source: PubMed Central journal article supplement (PMC7430911; doi:10.1186/s12859-020-03663-7), 2020-08-12
Supplement: 12859_2020_3663_MOESM1_ESM.pdf [file 12859_2020_3663_MOESM1_ESM.pdf]

### Algorithm convergence

THEOREM 1. Given matrix  $H$  and vectors  $RV\_D_i$ ,  $RV\_C_i$ ,  $VC_i^0$  and  $VD_i^0$ , the algorithm converges. The number of iteration depends on parameters  $\alpha$  and  $\delta$ .

PROOF. The convergence of the algorithm depends on Equation (6) and (7). Equation (6) converges if and only if  $\rho(\alpha H) < 1$  and Equation (7) converges if and only if  $\rho(\alpha H^T) = \rho(\alpha H) < 1$  ( $H=H^T$ ).  $\rho(\alpha H)$  is the spectral radius of matrix  $\alpha H$ . Since  $h(i,j) \geq 0$ , and for each row  $i$  of the matrix  $H$ , either  $\sum_{j=1}^n h(i,j) = 1$  or  $\sum_{j=1}^n h(i,j) = 0$ ,  $\rho(H) = \|H\|_1$ . It is easy to see that  $\rho(\alpha H) = \alpha \rho(H) < 1$  ( $0 < \alpha < 1$ ).

Therefore, Equation (6) and (7) converge and so does the Algorithm1.

Furthermore, according to Equation (6) and (7),

$$VD_i^t = \alpha HVC_i^{t-1} + (1-\alpha)RV\_D_i \quad VC_i^t = \alpha H^TVD_i^{t-1} + (1-\alpha)RV\_C_i$$

$$VD_i^{t-1} = \alpha HVC_i^{t-2} + (1-\alpha)RV\_D_i \quad VC_i^{t-1} = \alpha H^TVD_i^{t-2} + (1-\alpha)RV\_C_i$$

And thus, we can get:

$$VD_i^t - VD_i^{t-1} = \alpha H(VC_i^{t-1} - VC_i^{t-2})$$

= ...

$$= \begin{cases} (\alpha H)^{t-1} [\alpha HVC_i^0 - (1-\alpha)RV\_D_i - VD_i^0] & , \text{ if } t \bmod 2 = 1 \\ (\alpha H)^{t-1} [\alpha HVD_i^0 - (1-\alpha)RV\_C_i - VC_i^0] & , \text{ otherwise} \end{cases}$$

$$VC_i^t - VC_i^{t-1} = \alpha H^T(VD_i^{t-1} - VD_i^{t-2}) = \alpha H(VD_i^{t-1} - VD_i^{t-2})$$

= ...

$$= \begin{cases} (\alpha H)^{t-1} [\alpha HVD_i^0 - (1-\alpha)RV\_C_i - VC_i^0] & , \text{ if } t \bmod 2 = 1 \\ (\alpha H)^{t-1} [\alpha HVC_i^0 - (1-\alpha)RV\_D_i - VD_i^0] & , \text{ otherwise} \end{cases}$$

Therefore,

$$|VD_i^t - VD_i^{t-1}| + |VC_i^t - VC_i^{t-1}|$$

$$= |(\alpha H)^{t-1} [\alpha HVC_i^0 - (1-\alpha)RV\_D_i - VD_i^0]| + |(\alpha H)^{t-1} [\alpha HVD_i^0 - (1-\alpha)RV\_C_i - VC_i^0]|$$

$$= (\alpha H)^{t-1} (|[\alpha HVC_i^0 - (1-\alpha)RV\_D_i - VD_i^0]| + |[\alpha HVD_i^0 - (1-\alpha)RV\_C_i - VC_i^0]|)$$

$$\leq \alpha^{t-1} (|[\alpha HVC_i^0 - (1-\alpha)RV\_D_i - VD_i^0]| + |[\alpha HVD_i^0 - (1-\alpha)RV\_C_i - VC_i^0]|) \leq \delta,$$

and

$$t \geq \log(\delta / (|[\alpha HVC_i^0 - (1-\alpha)RV\_D_i - VD_i^0]| + |[\alpha HVD_i^0 - (1-\alpha)RV\_C_i - VC_i^0]|)) / \log \alpha$$

Clearly, given matrix  $H$  and vectors  $RV\_D_i$ ,  $RV\_C_i$ ,  $VC_i^0$  and  $VD_i^0$ , the number of iteration depends on parameters  $\alpha$  and  $\delta$ .
